# Supplementary material
Source: PubMed Central journal article supplement (PMC10676285)
Supplement: NIHMS1946402-supplement-1.pdf [file NIHMS1946402-supplement-1.pdf]

| <b>Supplemental Table 1: Sample Form for Data Extraction (applied to each study that met the inclusion criteria in the review)</b> |                                                               |                                                                                                                                                                                       |
|------------------------------------------------------------------------------------------------------------------------------------|---------------------------------------------------------------|---------------------------------------------------------------------------------------------------------------------------------------------------------------------------------------|
| <b>Data</b>                                                                                                                        | <b>Description of Data</b>                                    | <b>Data Categories</b>                                                                                                                                                                |
| <b>Publication Characteristics</b>                                                                                                 |                                                               |                                                                                                                                                                                       |
| Author name                                                                                                                        | Name of first author                                          | Write in                                                                                                                                                                              |
| Publication year                                                                                                                   | Year the article was published                                | Write in                                                                                                                                                                              |
| Publication citation                                                                                                               | Full citation of the article                                  | Write in                                                                                                                                                                              |
| <b>Study Characteristics</b>                                                                                                       |                                                               |                                                                                                                                                                                       |
| Geographic location                                                                                                                | Geographic location where the study was conducted             | 1=United States (specify state)<br>2=Other (specify)                                                                                                                                  |
| Data source                                                                                                                        | Source of the data                                            | Write in                                                                                                                                                                              |
| Sample size                                                                                                                        | Size of the study sample                                      | Write in                                                                                                                                                                              |
| Study design                                                                                                                       | Study design                                                  | 1=Cross-sectional<br>2=Cohort<br>3=Case-comparison<br>4=Other (specify)<br>5=None specified                                                                                           |
| Physical health outcome                                                                                                            | Physical health outcome under study                           | 1=Birth outcomes (specify type)<br>2=Cardiovascular (specify type)<br>3=Functional limitations (specify type)<br>4=Mortality (specify type)<br>5=Other (specify)                      |
| <b>Participant Characteristics</b>                                                                                                 |                                                               |                                                                                                                                                                                       |
| Age                                                                                                                                | Age range of study participants                               | Write in                                                                                                                                                                              |
| Sex                                                                                                                                | Sex of the study participants                                 | 1=Women<br>2=Men                                                                                                                                                                      |
| Racial and/or ethnic group                                                                                                         | Race and/or ethnicity of study participants                   | 1=African American or Black (specify)<br>2=Hispanic or Latinx (specify)<br>3=Asian (specify)<br>4=Other (specify)                                                                     |
| Nativity                                                                                                                           | Nativity status of participants                               | 1=Native-born (specify)<br>2=Foreign-born (specify)                                                                                                                                   |
| <b>Weathering Hypothesis Characteristics</b>                                                                                       |                                                               |                                                                                                                                                                                       |
| Type of test                                                                                                                       | The test used to examine the weathering hypothesis            | 1=Age patterns<br>2=Modifiers of age distributions (specify)<br>3=Biological/physiological stress mechanisms (specify)<br>4=Other (specify)                                           |
| Population comparisons                                                                                                             | Population comparisons used to test the weathering hypothesis | 1=African American or Black versus White (specify)<br>2=Hispanic/Latinx versus White (specify)<br>3=Asian versus White (specify)<br>4=Other (specify)                                 |
| Evidence                                                                                                                           | Evidence regarding support for the weathering hypothesis      | 1=Support (specify population, outcome, justification)<br>2=No support (specify population, outcome, justification)<br>3=Partial support (specify population, outcome, justification) |

|                                     |                                                                               |          |
|-------------------------------------|-------------------------------------------------------------------------------|----------|
| <b>Risk of Bias Characteristics</b> |                                                                               |          |
| Participant selection               | Methods to select/recruit participants (e.g. medical records)                 | Write in |
| Participant retention               | Location where participants were selected (e.g. hospital)                     | Write in |
| Measurement of exposure             | List of exposures and methods for measuring exposures                         | Write in |
| Measurement of outcome              | List of outcomes and methods for measuring outcomes                           | Write in |
| Confounding variables               | List of confounding variables and methods for measuring confounding variables | Write in |
| Statistical methods                 | Data analyses description and power/sample size assessment                    | Write in |
| Study limitations                   | Limitations of the study                                                      | Write in |

| <b>Supplemental Table 2. Adapted Version of the Quality in Prognostic (QUIPS) Tool (adapted for this systematic review)</b>                                                                    |                                                                                                                                                                                                                                                                                                                                                                                                                                                                                                                                                                                                                                     |                                                                                                                                                                                                                                                                                                                                             |
|------------------------------------------------------------------------------------------------------------------------------------------------------------------------------------------------|-------------------------------------------------------------------------------------------------------------------------------------------------------------------------------------------------------------------------------------------------------------------------------------------------------------------------------------------------------------------------------------------------------------------------------------------------------------------------------------------------------------------------------------------------------------------------------------------------------------------------------------|---------------------------------------------------------------------------------------------------------------------------------------------------------------------------------------------------------------------------------------------------------------------------------------------------------------------------------------------|
| <b>Domains</b>                                                                                                                                                                                 | <b>Basis for Judgment</b>                                                                                                                                                                                                                                                                                                                                                                                                                                                                                                                                                                                                           | <b>Ratings</b>                                                                                                                                                                                                                                                                                                                              |
| <b>Study Participation</b>                                                                                                                                                                     | <ul style="list-style-type: none"> <li>a. Adequate participation in the study by eligible persons</li> <li>b. Description of the source population or population of interest</li> <li>c. Description of the baseline study sample</li> <li>d. Adequate description of the sampling frame and recruitment</li> <li>e. Adequate description of the period and place of recruitment</li> <li>f. Adequate description of inclusion and exclusion criteria</li> </ul>                                                                                                                                                                    | <p><b>High Risk of Bias:</b> The relationship between the exposure and outcome is very likely to be different for participants and eligible nonparticipants</p> <p><b>Low Risk of Bias:</b> The relationship between the exposure and outcome may be or is unlikely to be different for participants and eligible nonparticipants</p>       |
| <b>Study Attrition</b>                                                                                                                                                                         | <ul style="list-style-type: none"> <li>a. Adequate response rate for study participants</li> <li>b. Description of attempts to collect information on participants who dropped out</li> <li>c. Reasons for loss to follow-up are provided</li> <li>d. Adequate description of participants lost to follow-up</li> <li>e. There are no important differences between participants who completed the study and those who did not</li> </ul>                                                                                                                                                                                           | <p><b>High Risk of Bias:</b> The relationship between the exposure and outcome is very likely to be different for completing and non-completing participants</p> <p><b>Low Risk of Bias:</b> The relationship between the exposure and outcome may be or is unlikely to be different for completing and non-completing participants</p>     |
| <b>Exposure Measurement</b>                                                                                                                                                                    | <ul style="list-style-type: none"> <li>a. A clear definition or description of the exposure is provided</li> <li>b. Method of exposure measurement is adequately valid and reliable</li> <li>c. Continuous variables are reported or appropriate cut points are used</li> <li>d. The method and setting of measurement of exposure is the same for all study participants</li> <li>e. Adequate proportion of the study sample has complete data for the exposure</li> <li>f. Appropriate methods of imputation are used for missing exposure data</li> </ul>                                                                        | <p><b>High Risk of Bias:</b> The measurement of the exposure is very likely to be different for different levels of the outcome of interest</p> <p><b>Low Risk of Bias:</b> The measurement of the exposure may be or is unlikely to be different for different levels of the outcome of interest</p>                                       |
| <b>Outcome Measurement</b>                                                                                                                                                                     | <ul style="list-style-type: none"> <li>a. A clear definition of the outcome is provided</li> <li>b. Method of outcome measurement used is adequately valid and reliable</li> <li>c. The method and setting of outcome measurement is the same for all study participants</li> </ul>                                                                                                                                                                                                                                                                                                                                                 | <p><b>High Risk of Bias:</b> The measurement of the outcome is very likely to be different related to the baseline level of the exposure</p> <p><b>Low Risk of Bias:</b> The measurement of the outcome may be or is unlikely to be different related to the baseline level of the exposure</p>                                             |
| <b>Study Confounding</b>                                                                                                                                                                       | <ul style="list-style-type: none"> <li>a. All important confounders are measured</li> <li>b. Clear definitions of the important confounders measured are provided</li> <li>c. Measurement of all important confounders is adequately valid and reliable</li> <li>d. The method and setting of confounding measurement are the same for all study participants</li> <li>e. Appropriate methods are used if imputation is used for missing confounder data</li> <li>f. Important potential confounders are accounted for in the study design</li> <li>g. Important potential confounders are accounted for in the analysis</li> </ul> | <p><b>High Risk of Bias:</b> The observed effect of the exposure on the outcome is very likely to be distorted by another factor related to exposure and outcome</p> <p><b>Low Risk of Bias:</b> The observed effect of the exposure on outcome may be or is unlikely to be distorted by another factor related to exposure and outcome</p> |
| <b>Statistical Analysis and Reporting</b>                                                                                                                                                      | <ul style="list-style-type: none"> <li>a. Sufficient presentation of data to assess the adequacy of the analytic strategy</li> <li>b. Strategy for model building is appropriate and is based on a conceptual framework or model</li> <li>c. The selected statistical model is adequate for the design of the study</li> <li>d. There is no selective reporting of results</li> </ul>                                                                                                                                                                                                                                               | <p><b>High Risk of Bias:</b> The reported results are very likely to be spurious or biased related to analysis or reporting</p> <p><b>Low Risk of Bias:</b> The reported results may be or are unlikely to be spurious or biased related to analysis or reporting</p>                                                                       |
| Source for the original QUIPS tool: Hayden JA, van der Windt DA, Cartwright JL, Côté P, Bombardier C. Assessing bias in studies of prognostic factors. <i>Ann Intern Med</i> 2013;158(4):280-6 |                                                                                                                                                                                                                                                                                                                                                                                                                                                                                                                                                                                                                                     |                                                                                                                                                                                                                                                                                                                                             |
